# Supplementary material
Source: HighWire-hosted journal article supplement (http://www.cmaj.ca/highwire/filestream/72866/field_highwire_adjunct_files/1/180717-res-2-at.pdf)
Supplement: 180717-res-2-at.pdf [file 180717-res-2-at.pdf]

**Appendix 2 (as supplied by the authors)**

| Basic characteristics by urate-lowering therapy exposure status                                                                                                    |                                              |                                             |                           |
|--------------------------------------------------------------------------------------------------------------------------------------------------------------------|----------------------------------------------|---------------------------------------------|---------------------------|
| Characteristics                                                                                                                                                    | Urate-lowering therapy unexposed<br>N=15,661 | Urate-lowering therapy exposed<br>N= 15,661 | Standardised difference * |
| Mean Age at urate-lowering therapy exposure (S.D.)                                                                                                                 | 65.3 (14.1)                                  | 65.3 (14.1)                                 | 0.001                     |
| Male                                                                                                                                                               | 11,834 (75.6)                                | 11,834 (75.6)                               | 0.000                     |
| Median follow-up after urate-lowering therapy (IQR)                                                                                                                | 3.3 (1.6-6.1)                                | 4.5 (2.3-7.5)                               | 0.121                     |
| Median time with gout before urate-lowering therapy (IQR)                                                                                                          | 1.9 (0.8-3.9)                                | 1.08 (0.6-3.3)                              | -0.281                    |
| <b>Body mass index</b>                                                                                                                                             |                                              |                                             |                           |
| Normal (18.5-24.9)                                                                                                                                                 | 3391 (21.7)                                  | 2,497 (15.9)                                | 0.238                     |
| Underweight (<18.5)                                                                                                                                                | 189 (1.2)                                    | 142 (0.9)                                   |                           |
| Overweight (25.29.9)                                                                                                                                               | 6,067 (38.7)                                 | 5,819 (37.2)                                |                           |
| Obese (>30)                                                                                                                                                        | 5,001 (31.9)                                 | 6,555 (41.9)                                |                           |
| Missing                                                                                                                                                            | 1,013 (6.5)                                  | 648 (4.1)                                   |                           |
| <b>Smoking status</b>                                                                                                                                              |                                              |                                             |                           |
| Never/Ex-smoker                                                                                                                                                    | 13,877 (88.6)                                | 14,489 (92.5)                               | 0.134                     |
| Current smokers                                                                                                                                                    | 1,784 (11.4)                                 | 1,172 (7.5)                                 |                           |
| <b>Charlson index (IQR)</b>                                                                                                                                        |                                              |                                             |                           |
| 0                                                                                                                                                                  | 6,092 (38.9)                                 | 4,923 (31.4)                                | -0.219                    |
| 1-2                                                                                                                                                                | 4,719 (30.1)                                 | 4,447 (28.4)                                |                           |
| 3-4                                                                                                                                                                | 2,789 (17.8)                                 | 3,167 (20.2)                                |                           |
| >5                                                                                                                                                                 | 2,061 (13.2)                                 | 3,124 (20.0)                                |                           |
| <b>Deprivation</b>                                                                                                                                                 |                                              |                                             |                           |
| 1 (Least deprived)                                                                                                                                                 | 4,014 (25.7)                                 | 3,357 (22.6)                                | 0.084                     |
| 2                                                                                                                                                                  | 3,904 (25.0)                                 | 3,878 (24.9)                                |                           |
| 3                                                                                                                                                                  | 3,194 (20.4)                                 | 3,262 (20.9)                                |                           |
| 4                                                                                                                                                                  | 2,679 (17.2)                                 | 2,829 (18.1)                                |                           |
| 5 (Most deprived)                                                                                                                                                  | 1,857 (11.9)                                 | 2,136 (13.7)                                |                           |
| <b>Comorbidities</b>                                                                                                                                               |                                              |                                             |                           |
| Hypertension                                                                                                                                                       | 5,196 (33.1)                                 | 6,271 (40.0)                                | 0.143                     |
| Diabetes                                                                                                                                                           | 1,683 (10.8)                                 | 2,212 (14.1)                                | 0.103                     |
| Aspirin                                                                                                                                                            | 4,389 (28.0)                                 | 5,255 (33.6)                                | 0.120                     |
| Thiazides                                                                                                                                                          | 5,150 (32.9)                                 | 5,864 (37.4)                                | 0.09                      |
| <b>Alcohol consumption</b>                                                                                                                                         |                                              |                                             |                           |
| Never/Ex-drinker                                                                                                                                                   | 1,815 (11.6)                                 | 1,925 (12.3)                                | 0.028                     |
| Current (<10 units/week)                                                                                                                                           | 6,340 (40.5)                                 | 6,364 (40.8)                                |                           |
| Current (≥10 units/week)                                                                                                                                           | 5,417 (34.6)                                 | 5,364 (34.3)                                |                           |
| Missing                                                                                                                                                            | 2,089 (13.3)                                 | 1,986 (12.7)                                |                           |
| *Standardized difference = difference in means or proportion divided by standard error; imbalance defined as absolute value greater than 0.10 (small effect size). |                                              |                                             |                           |
